# Supplementary material
Source: PubMed Central journal article supplement (PMC4023389)
Supplement: NIHMS129060-supplement-Supplemental_Figure_1.pdf [file NIHMS129060-supplement-Supplemental_Figure_1.pdf]

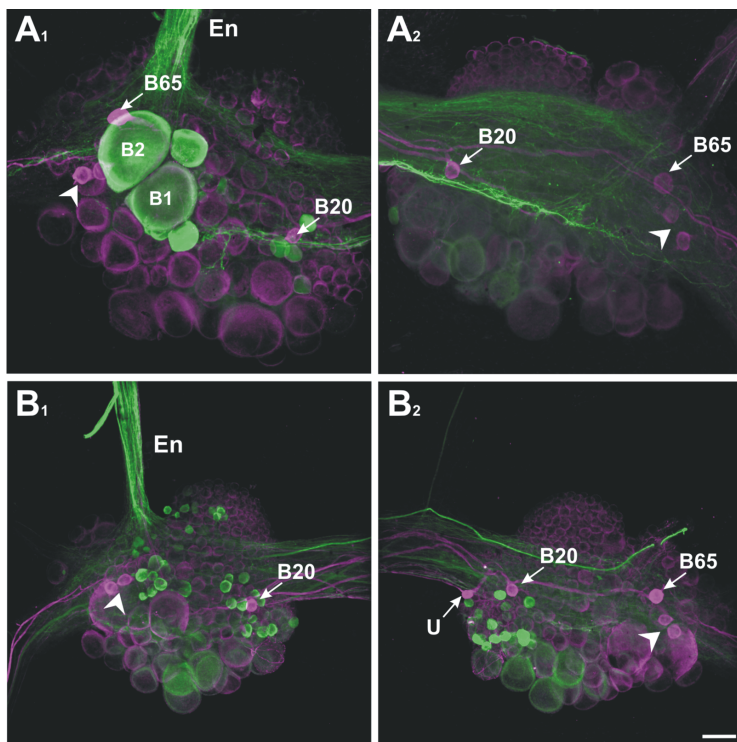

**Localization of Biogenic Amines in the Foregut of *Aplysia californica*:  
Catecholaminergic and Serotonergic Innervation**

Clarissa Martínez-Rubio, Geidy E. Serrano, and Mark W. Miller\*

Supplemental Figure 1. Magenta-green. Corresponds to Text Figure 3.

Double-labeling experiments demonstrating that THli neurons in the buccal ganglion do not project fibers to the esophageal nerve. (A1) Biocytin backfill (green) of the En1 branch of the esophageal nerve (En) overlaid with TH-like immunoreactivity (magenta) in the ipsilateral buccal hemiganglion. THli was present in a small number of buccal neurons, including B20, B65, and a pair of unidentified cells (arrowhead) on the caudal surface near the B1, B2 cluster. None of the THli neurons were double-labeled. (A2) Contralateral hemiganglion from the same preparation as A1. None of the THli neurons, including B20, B65, or the unidentified lateral neurons (arrowhead) were labeled by the contralateral En1 backfill. (B1) Biocytin backfill (green) of the En2 branch of the esophageal nerve (En) overlaid with TH-like immunoreactivity (red) in the ipsilateral buccal hemiganglion. None of the THli neurons, including B20 and the pair of unidentified lateral cells (arrowhead) were double-labeled. (B2) Contralateral hemiganglion from the same preparation as B1. None of the THli neurons, including an unpaired medial neuron (U; see Díaz-Ríos et al. 2002), B20, B65, or the unidentified lateral neurons (arrowhead) were labeled by the contralateral En2 backfill. Calibration bar = 100  $\mu$ m, applies to all panels.
