# Supplementary material
Source: PubMed Central journal article supplement (PMC4023389)
Supplement: NIHMS129060-supplement-Supplemental_Figure_3.pdf [file NIHMS129060-supplement-Supplemental_Figure_3.pdf]

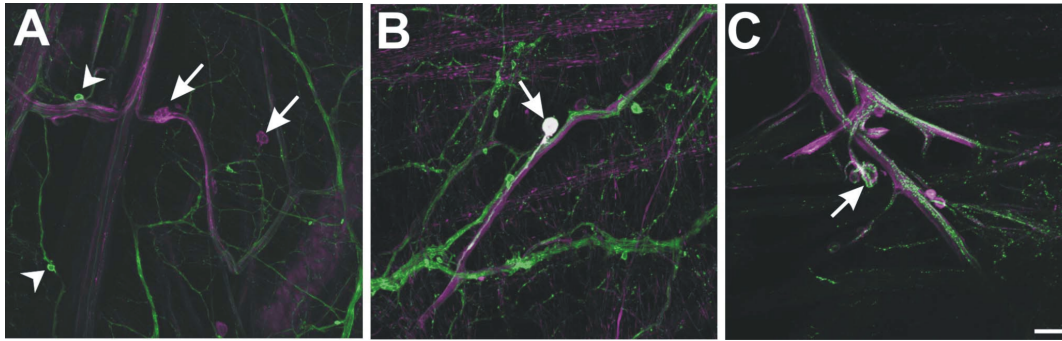

**Localization of Biogenic Amines in the Foregut of *Aplysia californica*:  
Catecholaminergic and Serotonergic Innervation**

Clarissa Martínez-Rubio, Geidy E. Serrano, and Mark W. Miller\*

Supplemental Figure 3. Magenta-green. Corresponds to Text Figure 9.

Double-labeling experiments illustrate relations between catecholaminergic and serotonergic innervation of the foregut. (A) Image of the pharynx region labeled for THli (green) and 5HTli (magenta). Several small THli cell bodies were observed (two indicated by arrowheads). Although no serotonergic somata were detected, several cell bodies were enveloped by varicose serotonergic fibers (two indicated by arrows). No TH-5HTli double labeled fibers or cell bodies were observed. Moreover, serotonergic somatic innervation was not found to occur on THli neurons. (B) Overlaid image of biocytin fill (magenta) of En2 toward the pharynx and THli (green). Although the majority of the THli cells in the pharynx did not exhibit double-labeling, THli was occasionally detected in pharyngeal neurons that had afferent En projections (cell appears white in overlay image, arrow). (C) Biocytin fill (magenta) of En2 toward the pharynx overlaid with 5HTli (green). No double-labeling was observed, but several filled peripheral cell bodies were enveloped with serotonergic fibers (two indicated by arrow), indicative of serotonergic regulation of CNS afferents. Calibration bar = 100  $\mu$ m, applies to all panels.
